# Supplementary material for: In situ nano Au triggered by a metal boron organic polymer: efficient electrochemical N2 fixation to NH3 under ambient conditions
Source: Royal Society of Chemistry journal article supplement (doi:10.1039/c9ta06573c), 2019-01-01
Supplement: c9ta06573c1.pdf [file c9ta06573c1.pdf]

## Supporting Information

### **In-situ Nano Au Triggered via Metal Boron Organic Polymers: Efficient Electrochemistry N<sub>2</sub> Fixation to NH<sub>3</sub> under Ambient Conditions**

Xue Zhao<sup>a</sup>, Chen Yao<sup>a</sup>, Hao Chen<sup>a</sup>, Yunfan Fu<sup>a</sup>, Changjun Xiang<sup>a</sup>, Suhang He<sup>b</sup>,  
Xiaohai Zhou<sup>\*,a,c</sup> and Haibo Zhang<sup>\*,a,d</sup>

**a** College of Chemistry and Molecular Sciences, Wuhan University, Wuhan 430072,  
P. R. China

**b** Department of Life Sciences and Chemistry, Jacobs University Bremen, Campus  
Ring 1, Bremen 28759, Germany

**c** Engineering Research Center of Organosilicon Compounds & Materials Ministry of  
Education, Wuhan 430072, P. R. China

**d** National Demonstration Center for Experimental Chemistry, Wuhan University,  
Wuhan 430072, P. R. China

\* Corresponding Author

Haibo Zhang, E-mail: [haibo Zhang1980@gmail.com](mailto:haibo Zhang1980@gmail.com)

Xiaohai Zhou, E-mail: [zxh7954@whu.edu.cn](mailto:zxh7954@whu.edu.cn)

# Contents

|                                                                                                                                                                                                     |     |
|-----------------------------------------------------------------------------------------------------------------------------------------------------------------------------------------------------|-----|
| <b>M-BOPs crystal culture details and crystal structure parsing methods</b> .....                                                                                                                   | S1  |
| <b>Possible pollution control</b> .....                                                                                                                                                             | S2  |
| <b><sup>15</sup>N<sub>2</sub> Isotope Labeling Experiments</b> .....                                                                                                                                | S4  |
| <b>Fig. S1</b> Standard curve of NH <sub>4</sub> Cl based on indophenol blue colorimetry.....                                                                                                       | S5  |
| <b>Fig.S2</b> N <sub>2</sub> H <sub>4</sub> standard curve based on Watt-Chrisp method .....                                                                                                        | S6  |
| <b>Fig.S3</b> Crystal structure of precursor M-BOPs. (a) a-axis field of view and (b) cell view.....                                                                                                | S7  |
| <b>Table S1.</b> Crystal data and structure refinement for M-BOPs .....                                                                                                                             | S8  |
| <b>Fig.S4</b> ICP-OES test results for Au/M-BOPs.....                                                                                                                                               | S9  |
| <b>Fig. S5</b> Isotopic label result of <sup>15</sup> NH <sub>4</sub> <sup>+</sup> obtained from the NRR reaction (at -0.2 V vs RHE) using <sup>15</sup> N <sub>2</sub> as the nitrogen source..... | S10 |
| <b>Fig.S6</b> XPS test result of Au/M-BOPs after electrochemical NRR test .....                                                                                                                     | S11 |
| <b>Fig.S7</b> HRTEM test result of Au/M-BOPs after electrochemical NRR test .....                                                                                                                   | S12 |
| <b>Fig.S8</b> The FT-IR spectrum of 1'10-phenanthroline and electrolyte (concentrate to dry).....                                                                                                   | S13 |
| <b>Table S2.</b> Comparison of electro-catalytic NRR performance of various catalysts (NH <sub>3</sub> yield: ug•h <sup>-1</sup> •mg <sub>cat.</sub> <sup>-1</sup> ).....                           | S14 |
| <b>Table S3.</b> Comparison of electro-catalytic NRR performance of various catalysts (NH <sub>3</sub> yield: ug•h <sup>-1</sup> •cm <sup>-2</sup> ).....                                           | S15 |
| <b>References</b> .....                                                                                                                                                                             | S16 |

## **M-BOPs crystal culture details and crystal structure parsing methods**

### ***M-BOPs crystal culture details***

10 mg M-BOPs were re-dispersed in a mixture of 15 mL N, N-dimethylformamide and H<sub>2</sub>O (V/V=1:1), and then transferred to a 25 mL hydrothermal reactor containing Teflon liner. The reactor temperature was raised to 140 °C in 10 min and maintained for 24 h. Then, the temperature was lowered to room temperature at a temperature decreasing rate of 0.1 °C/min, and a magenta crystal was obtained and used for the test of the single crystal structure.

### ***Crystal structure parsing methods***

Crystal data of M-BOPs were collected at 123.0(1) K on an Agilent Super-Nova diffractometer using mirror-monochromatized Cu-K $\alpha$  ( $\lambda = 1.54184 \text{ \AA}$ ) radiation. The crystals were mounted on a Hampton cryoloop with light oil to prevent water loss. The SHELX package (Bruker) is used to solve and improve the structure. Apply the SADABS program to empirical absorption correction. The structure is solved by a direct method, and the anisotropic thermal parameters of all the heavy atoms contained in the model are refined by the full matrix least squares method ( $\sum w(|F_o| - |F_c|)^2$ ). A hydrogen atom of an organic group is introduced at a geometrically calculated position. These data can be obtained free of charge from the Cambridge Crystallographic Data Center via [www.ccdc.cam.ac.uk/data\\_request/cif](http://www.ccdc.cam.ac.uk/data_request/cif) (code: 1899654).

## Possible pollution control

1. The entire electrolyzer (without CP and catalyst) was tested at an open circuit potential for 2 h to determine if ammonia was introduced during the production of the device, and the device without ammonia contamination was washed with ultrapure water at least five times before each use.
2. In order to prevent contamination from commercial hydrochloric acid, the raw materials used to prepare 0.1M HCl electrolyte:

Ultrapure water: Milli-Q ultrapure water ( $18 \text{ M}\Omega\cdot\text{cm}^{-1}$ )

0.1M HCl was prepared by the following method:

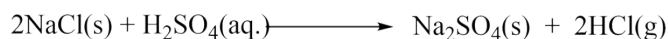

Make sure that the 0.1M HCl prepared was not sufficient to change the color of the indophenol blue developer relative to the blank before use it.

3. The ultrapure Ar,  $^{14}\text{N}_2$  and  $^{15}\text{N}_2$  used in the experiment were previously passed through multiple acid trap ( $0.05 \text{ M H}_2\text{SO}_4$ ) wash. The number of  $0.05 \text{ M H}_2\text{SO}_4$  lotion devices set was based on the fact that the ammonia in wash solution in the last device was not detected by indophenol blue colorimetry (or almost no change in color of indophenol blue relative to the blank).

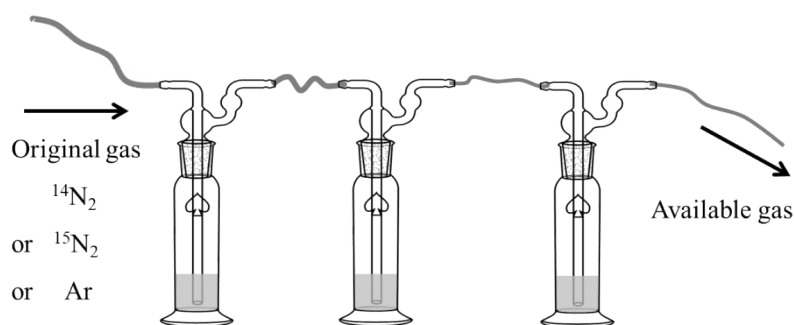

4. Carbon paper (CP) was soaked for several times with a large amount of 0.1m HCl until the presence of ammonia could not be detected in the last soaking solution by indophol blue colouring, and then it was electrolyzed for 2h at the open circuit voltage (Ar filling) until no ammonia could be detected in the electrolyte, which was used for catalyst load after continuous vacuum drying.
5. The catalyst was washed with a large amount of 0.1m HCl for several times in

advance, until the presence of ammonia could not be detected in the washing liquid, so as to prevent the interference of raw materials not completely removed in the preparation process.

6. The nafion proton exchange membrane treated with  $\text{H}_2\text{O}_2$ ,  $\text{H}_2\text{SO}_4$ , and ultrapure water was washed with a large amount of ultrapure water and electrolyzed at an open circuit voltage for 2 h (under Ar flow). The above two processes were alternated until it was difficult to detect ammonia.

## **$^{15}\text{N}_2$ Isotope Labeling Experiments**

An isotopic labeling experiment used  $^{15}\text{N}_2$  (98 atom%  $^{15}\text{N}$  purchased from Sigma-Aldrich Chemical Reagent Co.) as the feed gas was conducted to elucidate the activity origin of ammonia under Au/M-BOPs. The electrolyte volume was 75 ml and  $^{15}\text{N}_2$  gas was purified by acid trap (0.05 M  $\text{H}_2\text{SO}_4$ ) before entering the electrochemical chamber (the flow rate of  $^{15}\text{N}_2$  was 5 sccm). After  $^{15}\text{NRR}$  for 2h at  $-0.2$  V vs. RHE in 0.10 M HCl solution, the obtained  $^{15}\text{NH}_4^+$  electrolyte was determined by  $^1\text{H}$  nuclear magnetic resonance (NMR, 400 MHz). To prepare the NMR sample, 75mL of electrolyte after NRR was concentrated to near dryness. Then 1.0 mL of deuterated DMSO was added for NMR test and the NMR measurement was carried out with 1024 scans (1 h).

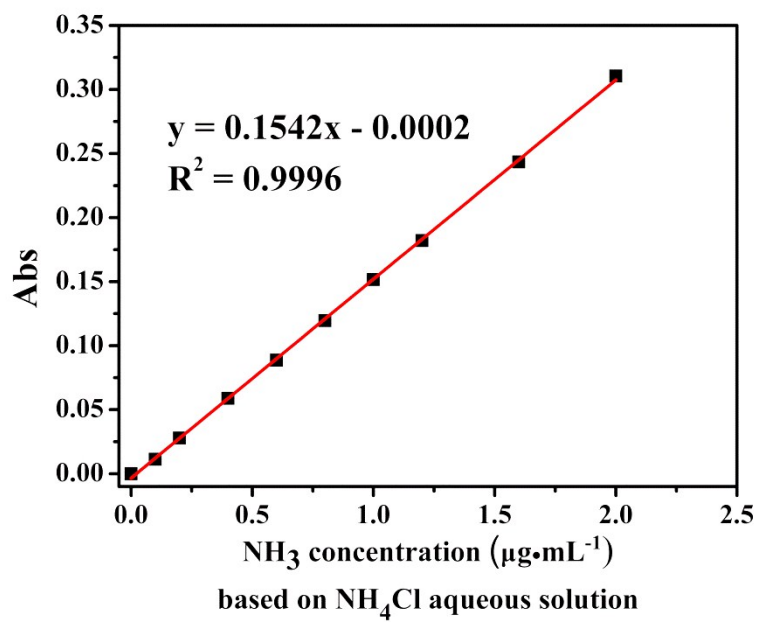

**Fig. S1** Standard curve of NH<sub>4</sub>Cl based on indophenol blue colorimetry.

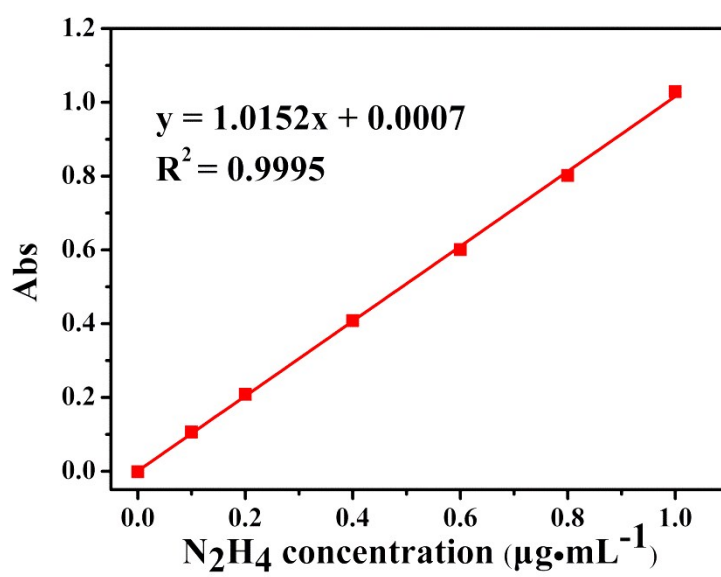

**Fig.S2** N<sub>2</sub>H<sub>4</sub> standard curve based on Watt-Chrisp method.



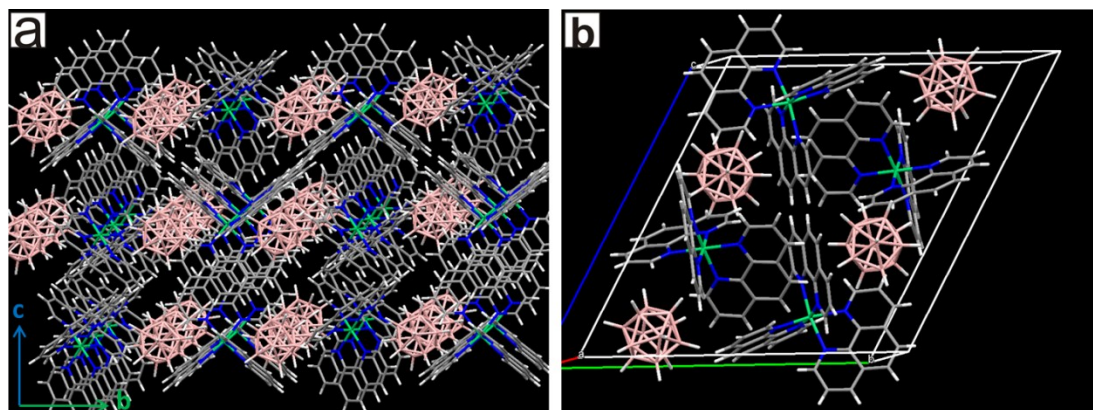

**Fig.S3** Crystal structure of precursor M-BOPs. (a) a-axis field of view and (b) cell view.

**Table S1. Crystal data and structure refinement for M-BOPs.**

---

|                                             |                                                                                                |
|---------------------------------------------|------------------------------------------------------------------------------------------------|
| Identification code                         | 2                                                                                              |
| Empirical formula                           | C <sub>81</sub> H <sub>95</sub> B <sub>24</sub> N <sub>15</sub> Ni <sub>2</sub> O <sub>4</sub> |
| Formula weight                              | 1719.57                                                                                        |
| Temperature/K                               | 150.00(10)                                                                                     |
| Crystal system                              | triclinic                                                                                      |
| Space group                                 | P-1                                                                                            |
| a/Å                                         | 13.8650(4)                                                                                     |
| b/Å                                         | 18.8050(5)                                                                                     |
| c/Å                                         | 19.2331(5)                                                                                     |
| α/°                                         | 61.953(3)                                                                                      |
| β/°                                         | 87.914(2)                                                                                      |
| γ/°                                         | 84.292(2)                                                                                      |
| Volume/Å <sup>3</sup>                       | 4403.5(2)                                                                                      |
| Z                                           | 2                                                                                              |
| ρ <sub>calc</sub> /g/cm <sup>3</sup>        | 1.297                                                                                          |
| μ/mm <sup>-1</sup>                          | 0.984                                                                                          |
| F(000)                                      | 1788.0                                                                                         |
| Crystal size/mm <sup>3</sup>                | 0.18 × 0.16 × 0.14                                                                             |
| Radiation                                   | CuKα (λ = 1.54184)                                                                             |
| 2θ range for data collection/°              | 7.956 to 131.996                                                                               |
| Index ranges                                | -15 ≤ h ≤ 16, -22 ≤ k ≤ 22, -22 ≤ l ≤ 22                                                       |
| Reflections collected                       | 24908                                                                                          |
| Independent reflections                     | 15228 [R <sub>int</sub> = 0.0419, R <sub>sigma</sub> = 0.0551]                                 |
| Data/restraints/parameters                  | 15228/118/1192                                                                                 |
| Goodness-of-fit on F <sup>2</sup>           | 1.033                                                                                          |
| Final R indexes [I ≥ 2σ (I)]                | R <sub>1</sub> = 0.0549, wR <sub>2</sub> = 0.1509                                              |
| Final R indexes [all data]                  | R <sub>1</sub> = 0.0638, wR <sub>2</sub> = 0.1613                                              |
| Largest diff. peak/hole / e Å <sup>-3</sup> | 0.72/-0.93                                                                                     |

---

| Identification code                | Analysis target name          | Intensity (corrected)        | Concentration (corrected)        | Calibration unit                                                                                                                                                   | Standard deviation | Relative standard deviation (concentration) |
|------------------------------------|-------------------------------|------------------------------|----------------------------------|--------------------------------------------------------------------------------------------------------------------------------------------------------------------|--------------------|---------------------------------------------|
| Calibration blank 1                | Au 267.595                    | 297.4125453                  | [0.00]                           | mg/L                                                                                                                                                               | 0                  | 0                                           |
| Calibration standard sample 1      | Au 267.595                    | 2348.918512                  | [0.10]                           | mg/L                                                                                                                                                               | 1.32E-09           | 1.32E-06                                    |
| Calibration standard sample 2      | Au 267.595                    | 4832.382822                  | [0.20]                           | mg/L                                                                                                                                                               | 2.63E-09           | 1.32E-06                                    |
| Calibration standard sample 3      | Au 267.595                    | 9830.452548                  | [0.40]                           | mg/L                                                                                                                                                               | 5.27E-09           | 1.32E-06                                    |
| Calibration standard sample 4      | Au 267.595                    | 24921.80209                  | [1.0]                            | mg/L                                                                                                                                                               | 0                  | 0                                           |
| Calibration standard sample 5      | Au 267.595                    | 103075.8024                  | [4.0]                            | mg/L                                                                                                                                                               | 0                  | 0                                           |
| Calibration standard sample 6      | Au 267.595                    | 251587.3171                  | [10]                             | mg/L                                                                                                                                                               | 0                  | 0                                           |
| <b>Au (sample)</b>                 | <b>Au 267.595</b>             | <b>152304.2649</b>           | <b>[6.034]</b>                   | <b>mg/L</b>                                                                                                                                                        | <b>0.064433715</b> | <b>1.067843376</b>                          |
| <b>Repeat measurement number 1</b> | <b>Intensity (net value)1</b> | <b>Intensity(corrected)1</b> | <b>Concentration(corrected)1</b> | <b>Preparation method of ICP-OES test sample:</b>                                                                                                                  |                    |                                             |
| 1                                  | 374.8781287                   | 374.8781287                  |                                  | 5.0 mg Au/M-BOPs were dissolved in 10 mL aqua regia, then 1 mL of the supernatant was removed and diluted to 10 mL with ultrapure water for ICP-OES determination. |                    |                                             |
| 1                                  | 2654.05529                    | 2356.642745                  |                                  | ICP-OES determination concentration: <b>6.034 mg / L</b>                                                                                                           |                    |                                             |
| 1                                  | 5186.36917                    | 4888.956625                  |                                  | <b>Results: The mass percentage of Au in Au/M-BOPs is: 12.068 w%</b>                                                                                               |                    |                                             |
| 1                                  | 10137.88127                   | 9840.468726                  |                                  |                                                                                                                                                                    |                    |                                             |
| 1                                  | 24965.66373                   | 24668.25119                  |                                  |                                                                                                                                                                    |                    |                                             |
| 1                                  | 104209.2867                   | 103911.8742                  |                                  |                                                                                                                                                                    |                    |                                             |
| 1                                  | 252052.1746                   | 251754.7621                  |                                  |                                                                                                                                                                    |                    |                                             |
| 1                                  | 154312.2137                   | 154014.8011                  | 6.101804155                      |                                                                                                                                                                    |                    |                                             |
| <b>Repeat measurement number 2</b> | <b>Intensity (net value)2</b> | <b>Intensity(corrected)2</b> | <b>Concentration(corrected)2</b> |                                                                                                                                                                    |                    |                                             |
| 2                                  | 264.6234291                   | 264.6234291                  |                                  |                                                                                                                                                                    |                    |                                             |
| 2                                  | 2612.128069                   | 2314.715524                  |                                  |                                                                                                                                                                    |                    |                                             |
| 2                                  | 5142.0889                     | 4844.676355                  |                                  |                                                                                                                                                                    |                    |                                             |
| 2                                  | 10082.96721                   | 9785.554668                  |                                  |                                                                                                                                                                    |                    |                                             |
| 2                                  | 25395.47477                   | 25098.06223                  |                                  |                                                                                                                                                                    |                    |                                             |
| 2                                  | 102131.245                    | 101833.8325                  |                                  |                                                                                                                                                                    |                    |                                             |
| 2                                  | 250745.7449                   | 250448.3323                  |                                  |                                                                                                                                                                    |                    |                                             |
| 2                                  | 151076.9617                   | 150779.5492                  | 5.973569714                      |                                                                                                                                                                    |                    |                                             |
| <b>Repeat measurement number 3</b> | <b>Intensity (net value)3</b> | <b>Intensity(corrected)3</b> | <b>Concentration(corrected)3</b> |                                                                                                                                                                    |                    |                                             |
| 3                                  | 252.7360779                   | 252.7360779                  |                                  |                                                                                                                                                                    |                    |                                             |
| 3                                  | 2672.809811                   | 2375.397266                  |                                  |                                                                                                                                                                    |                    |                                             |
| 3                                  | 5060.928032                   | 4763.515487                  |                                  |                                                                                                                                                                    |                    |                                             |
| 3                                  | 10162.7468                    | 9865.334251                  |                                  |                                                                                                                                                                    |                    |                                             |
| 3                                  | 25296.50539                   | 24999.09285                  |                                  |                                                                                                                                                                    |                    |                                             |
| 3                                  | 103779.1131                   | 103481.7006                  |                                  |                                                                                                                                                                    |                    |                                             |
| 3                                  | 252856.2693                   | 252558.8568                  |                                  |                                                                                                                                                                    |                    |                                             |
| 3                                  | 152415.857                    | 152118.4445                  | 6.026638993                      |                                                                                                                                                                    |                    |                                             |

**Fig.S4 ICP-OES test results for Au/M-BOPs.**

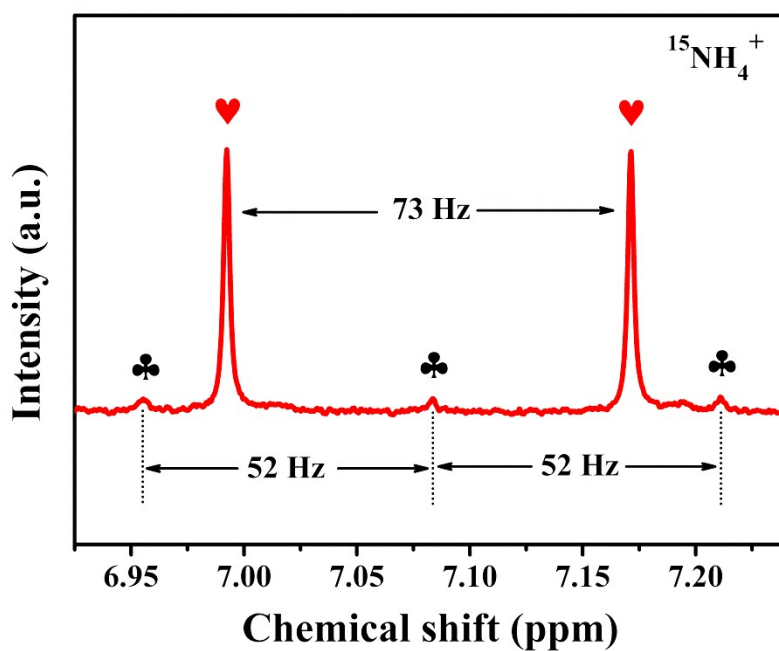

**Fig. S5** Isotopic label result of  $^{15}\text{NH}_4^+$  obtained from the NRR reaction (at  $-0.2$  V vs RHE) using  $^{15}\text{N}_2$  as the nitrogen source. (♥ is the signal of H in  $^{15}\text{NH}_4^+$ ; ♣, this extremely low value can be regarded as caused by  $^{14}\text{NH}_4^+$ ,  $^{14}\text{N}_2$  is difficult to completely remove from the electrolyte).

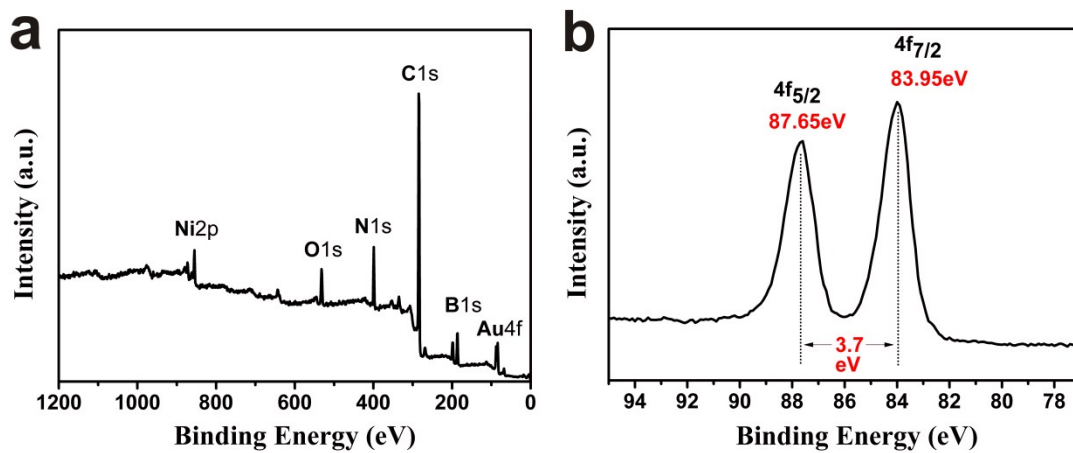

**Fig.S6** XPS test result of Au/M-BOPs after electrochemical NRR test.

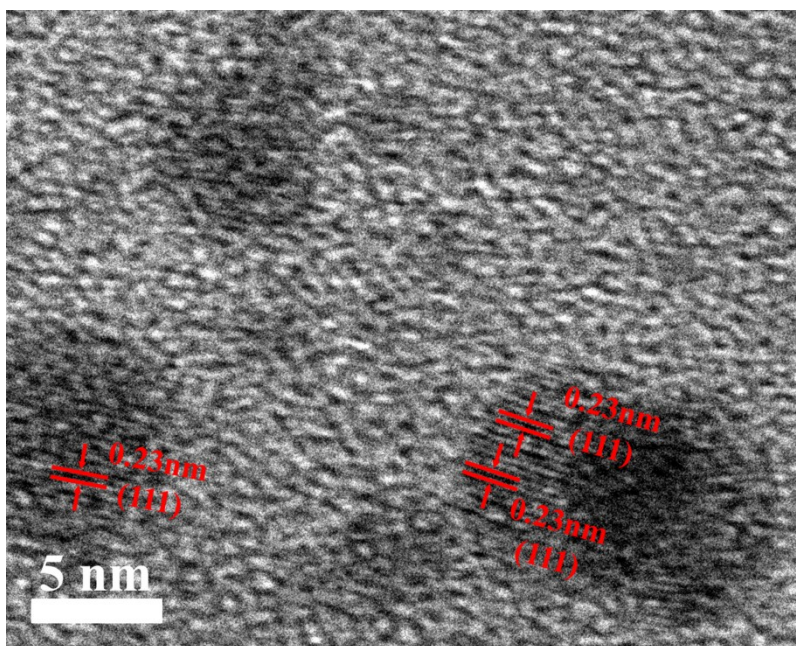

**Fig.S7** HRTEM test result of Au/M-BOPs after electrochemical NRR test.

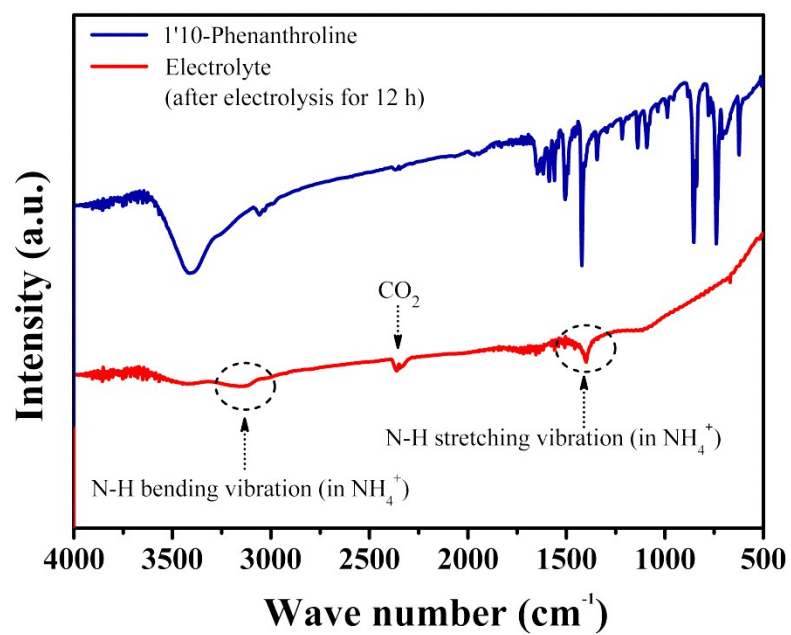

**Fig.S8** The FT-IR spectrum of 1'10-phenanthroline and electrolyte (concentrate to dry)

**Table S2.** Comparison of electro-catalytic NRR performance of various catalysts (NH<sub>3</sub> yield: ug•h<sup>-1</sup>•mgcat.<sup>-1</sup>).

| Catalyst                                 | Electrolyte                           | NH <sub>3</sub> yield<br>(ug•h <sup>-1</sup> •mgcat. <sup>-1</sup> ) | FE (%)       | Year        | Ref.             |
|------------------------------------------|---------------------------------------|----------------------------------------------------------------------|--------------|-------------|------------------|
| Mo <sub>2</sub> N nanorod                |                                       | 78.50                                                                | 4.5          | 2018        | 1                |
| <b>Au/ M-BOPs</b>                        | <b>0.1 M HCl</b>                      | <b>75.89</b>                                                         | <b>10.35</b> | <b>2019</b> | <b>This work</b> |
| Nb <sub>2</sub> O <sub>5</sub>           |                                       | 43.60                                                                | 9.26         | 2018        | 2                |
| Fe-N/C                                   |                                       | 34.83                                                                | 9.28         | 2019        | 3                |
| SA-Mo/NPC                                | 0.1 M KOH                             | 34.0                                                                 | 14.6         | 2018        | 4                |
| FL-BP NSs                                | 0.01 M HCl                            | 31.37                                                                | 5.07         | 2018        | 5                |
| Cr <sub>2</sub> O <sub>3</sub> nanofiber | 0.1 M HCl                             | 28.13                                                                | 8.56         | 2018        | 6                |
| B <sub>4</sub> C                         | 0.1 M HCl                             | 26.57                                                                | 15.95        | 2018        | 7                |
| Au flowers                               | 0.1 M HCl                             | 25.57                                                                | 6.05         | 2018        | 8                |
| O-KFCNTs                                 | 0.1 M HCl                             | 25.12                                                                | 9.1          | 2019        | 9                |
| MoS <sub>2</sub> -rGO                    | 0.1 M LiClO <sub>4</sub>              | 24.82                                                                | 4.58         | 2019        | 10               |
| BVC-A                                    |                                       | 23.21                                                                | 10.16        | 2018        | 11               |
| Co QD/RGO                                | 0.1 M Na <sub>2</sub> SO <sub>4</sub> | 21.5                                                                 | 8.3          | 2019        | 12               |
| Au/TiO <sub>2</sub>                      | 0.1 M HCl                             | 21.4                                                                 | 8.11         | 2017        | 13               |
| Ti <sub>3</sub> C <sub>2</sub> Tx        | 0.1 M HCl                             | 20.4                                                                 | 9.3          | 2018        | 14               |
| Fe <sub>2</sub> O <sub>3</sub>           | 0.1 M Na <sub>2</sub> SO <sub>4</sub> | 15.9                                                                 | 0.94         | 2018        | 15               |
| CrO <sub>0.66</sub> N <sub>0.56</sub>    |                                       | 15.6                                                                 | 6.7          | 2018        | 16               |
| B-TiO <sub>2</sub>                       | 0.1 M Na <sub>2</sub> SO <sub>4</sub> | 14.4                                                                 | 3.4          | 2018        | 17               |
| Bi NS                                    | 0.1 M Na <sub>2</sub> SO <sub>4</sub> | 13.23                                                                | 10.46        | 2019        | 18               |
| Mn <sub>3</sub> O <sub>4</sub>           | 0.1 M Na <sub>2</sub> SO <sub>4</sub> | 11.6                                                                 | 3.0          | 2018        | 19               |
| Mo <sub>2</sub> C/C                      | 0.5 M Li <sub>2</sub> SO <sub>4</sub> | 11.3                                                                 | 7.85         | 2018        | 20               |
| α-Au/CeO <sub>x</sub> -RGO               |                                       | 8.3                                                                  | 10.10        | 2017        | 21               |
| PCN-VN <sub>4</sub>                      |                                       | 8.09                                                                 | 11.59        | 2018        | 22               |
| BCN                                      |                                       | 7.75                                                                 | 13.79        | 2019        | 23               |
| Pd <sub>0.2</sub> Cu <sub>0.8</sub> /rGO | 0.1 M KOH                             | 2.8                                                                  | 9.3          | 2018        | 24               |
| THH Au NRs.                              |                                       | 1.648                                                                | 4.0          | 2017        | 25               |
| γ-Fe <sub>2</sub> O <sub>3</sub>         | 0.5 M KOH                             | 0.212                                                                | 1.9          | 2017        | 26               |



**Table S3.** Comparison of electro-catalytic NRR performance of various catalysts (NH<sub>3</sub> yield:  $\mu\text{g}\cdot\text{h}^{-1}\cdot\text{cm}^{-2}$ ).

| Catalyst                           | Electrolyte                                                                       | NH <sub>3</sub> yield<br>( $\mu\text{g}\cdot\text{h}^{-1}\cdot\text{cm}^{-2}$ ) | FE (%)       | Year        | Ref.             |
|------------------------------------|-----------------------------------------------------------------------------------|---------------------------------------------------------------------------------|--------------|-------------|------------------|
| C-ZIF-1100-1h                      | 0.1 M NaOH                                                                        | 57.8                                                                            | 10.2         | 2018        | 27               |
| <b>Au/ M-BOPs</b>                  | <b>0.1 M HCl</b>                                                                  | <b>45.54</b>                                                                    | <b>10.35</b> | <b>2019</b> | <b>This work</b> |
| Au-PTFE/TS                         | 0.05 M H <sub>2</sub> SO <sub>4</sub>                                             | 18.9                                                                            | 37.8         | 2019        | 28               |
| VN/CC                              | 0.1 M HCl                                                                         | 15.17                                                                           | 3.58         | 2018        | 29               |
| BC <sub>3</sub>                    | 0.05 M H <sub>2</sub> SO <sub>4</sub>                                             | 9.8                                                                             | 10.8         | 2018        | 30               |
| SnO <sub>2</sub> /CC               | 0.1 M Na <sub>2</sub> SO <sub>4</sub>                                             | 9.0                                                                             | 2.17         | 2018        | 31               |
| TiO <sub>2</sub> /Ti               | 0.1 M Na <sub>2</sub> SO <sub>4</sub>                                             | 5.6                                                                             | 2.5          | 2018        | 32               |
| MoS <sub>2</sub> /CC               | 0.1 M HCl                                                                         | 4.94                                                                            | 1.17         | 2018        | 33               |
| AuHNCs                             | 0.5 M LiClO <sub>4</sub>                                                          | 3.9                                                                             | 30.2         | 2018        | 34               |
| Fe <sub>3</sub> O <sub>4</sub> /Ti | 0.1 M Na <sub>2</sub> SO <sub>4</sub>                                             | 3.43                                                                            | 2.6          | 2018        | 35               |
| Ag/CPE                             | 0.1 M HCl                                                                         | 2.83                                                                            | 4.8          | 2018        | 36               |
| PEBCD/C                            | 0.5 M Li <sub>2</sub> SO <sub>4</sub> and<br>0.5 M H <sub>2</sub> SO <sub>4</sub> | 2.01                                                                            | 1.71         | 2017        | 37               |
| Mo-D-R-5h                          | 0.01 M H <sub>2</sub> SO <sub>4</sub>                                             | 1.89                                                                            | 0.72         | 2017        | 38               |

## References

1. X. Ren, G. Cui, L. Chen, F. Xie, Q. Wei, Z. Tian and X. Sun, *Chem. Commun.*, 2018, **54**, 8474-8477.
2. J. Han, Z. Liu, Y. Ma, G. Cui, F. Xie, F. Wang, Y. Wu, S. Gao, Y. Xu and X. Sun, *Nano Energy*, 2018, **52**, 264-270.
3. Y. Wang, X. Cui, J. Zhao, G. Jia, L. Gu, Q. Zhang, L. Meng, Z. Shi, L. Zheng, C. Wang, Z. Zhang and W. Zheng, *ACS Catal.*, 2018, **9**, 336-344.
4. L. Han, J. Liu, J. Chen, R. Lin, H. Liu, F. Lu, S. Bak, Z. Liang, S. Zhao, S. Eli, J. Luo, R. A. Radoslav and H. Xin, *Angew. Chem. Int. Ed.*, 2019, **58**, 2321-2325.
5. L. Zhang, L. X. Ding, G. F. Chen, X. Yang and H. Wang, *Angew. Chem. Int. Ed.*, 2019, **58**, 2612-2616.
6. H. Du, X. Guo, R. M. Kong and F. Qu, *Chem. Commun.*, 2018, **54**, 12848-12851.
7. W. Qiu, X. Y. Xie, J. Qiu, W. H. Fang, R. Liang, X. Ren, X. Ji, G. Cui, A. M. Asiri, G. Cui, B. Tang and X. Sun, *Nat. Commun.*, 2018, **9**, 3485-3492.
8. Z. Wang, Y. Li, H. Yu, Y. Xu, H. Xue, X. Li, H. Wang and L. Wang, *ChemSusChem*, 2018, **11**, 3480-3485.
9. T. Wu, P. Li, H. Wang, R. Zhao, Q. Zhou, W. Kong, M. Liu, Y. Zhang, X. Sun and F. Gong, *Chem. Commun.*, 2019, **55**, 2684-2687.
10. X. Li, X. Ren, X. Liu, J. Zhao, X. Sun, Y. Zhang, X. Kuang, T. Yan, Q. Wei and D. Wu, *J. Mater. Chem. A*, 2019, **7**, 2524-2528.
11. C. Lv, C. Yan, G. Chen, Y. Ding, J. Sun, Y. Zhou and G. Yu, *Angew. Chem. Int. Ed.*, 2018, **57**, 6073-6076.
12. K. Chu, Y. Liu, Y. Li, H. Zhang and Y. Tian, *J. Mater. Chem. A*, 2019, **7**, 4389-4394.
13. M. M. Shi, D. Bao, B. R. Wulan, Y. H. Li, Y. F. Zhang, J. M. Yan and Q. Jiang, *Adv. Mater.*, 2017, **29**, 1606550-1606556.
14. J. Zhao, L. Zhang, X. Y. Xie, X. Li, Y. Ma, Q. Liu, W. H. Fang, X. Shi, G. Cui and X. Sun, *J. Mater. Chem. A*, 2018, **6**, 24031-24035.
15. X. Xiang, Z. Wang, X. Shi, M. Fan and X. Sun, *ChemCatChem*, 2018, **10**, 4530-4535.
16. Y. Yao, Q. Feng, S. Zhu, J. Li, Y. Yao, Y. Wang, Q. Wang, M. Gu, H. Wang, H. Li, X. Yuan and M. Shao, *Small Methods*, 2018, 1800324-1800328.
17. Y. Wang, K. Jia, Q. Pan, Y. Xu, Q. Liu, G. Cui, X. Guo and X. Sun, *ACS Sustainable Chem. Eng.*, 2018, **7**, 117-122.
18. L. Li, C. Tang, B. Xia, H. Jin, Y. Zheng and S. Qiao, *ACS Catal.*, 2019, **9**, 2902-2908.
19. X. Wu, L. Xia, Y. Wang, W. Lu, Q. Liu, X. Shi and X. Sun, *Small*, 2018, **14**, 1803111-1803116.
20. H. Cheng, L. X. Ding, G. F. Chen, L. Zhang, J. Xue and H. Wang, *Adv. Mater.*, 2018, **30**, 1803694-1803700.
21. S. J. Li, D. Bao, M. M. Shi, B. R. Wulan, J. M. Yan and Q. Jiang, *Adv. Mater.*, 2017, **29**, 1700001-1700006.
22. C. Lv, Y. Qian, C. Yan, Y. Ding, Y. Liu, G. Chen and G. Yu, *Angew. Chem. Int. Ed.*, 2018, **57**, 10246-10250.
23. C. Chen, D. Yan, Y. Wang, Y. Zhou, Y. Zou, Y. Li and S. Wang, *Small*, 2019, **15**, 1805029-1805037.
24. M. Shi, D. Bao, S. Li, B. Wulan, J. Yan and Q. Jiang, *Adv. Energy Mater.*, 2018, **8**, 1800124-1800129.
25. D. Bao, Q. Zhang, F. L. Meng, H. X. Zhong, M. M. Shi, Y. Zhang, J. M. Yan, Q. Jiang and X. B. Zhang,

- Adv. Mater.*, 2017, **29**, 1604799-1604803.
26. J. Kong, A. Lim, C. Yoon, J. H. Jang, H. C. Ham, J. Han, S. Nam, D. Kim, Y. Sung, J. Choi and H. S. Park, *ACS Sustainable Chem. Eng.*, 2017, **5**, 10986-10995.
27. S. Mukherjee, D. A. Cullen, S. Karakalos, K. Liu, H. Zhang, S. Zhao, H. Xu, K. L. More, G. Wang and G. Wu, *Nano Energy*, 2018, **48**, 217-226.
28. J. Zheng, Y. Lyu, M. Qiao, R. Wang, Y. Zhou, H. Li, C. Chen, Y. Li, H. Zhou, S. P. Jiang and S. Wang, *Chem*, 2019, **5**, 617-633.
29. X. Cui, C. Tang and Q. Zhang, *Adv. Energy Mater.*, 2018, **8**, 1800369-1800393.
30. X. Yu, P. Han, Z. Wei, L. Huang, Z. Gu, S. Peng, J. Ma and G. Zheng, *Joule*, 2018, **2**, 1610-1622.
31. L. Zhang, X. Ren, Y. Luo, X. Shi, A. M. Asiri, T. Li and X. Sun, *Chem. Commun.*, 2018, **54**, 12966-12969.
32. R. Zhang, X. Ren, X. Shi, F. Xie, B. Zheng, X. Guo and X. Sun, *ACS Appl. Mater. Interfaces*, 2018, **10**, 28251-28255.
33. L. Zhang, X. Ji, X. Ren, Y. Ma, X. Shi, Z. Tian, A. M. Asiri, L. Chen, B. Tang and X. Sun, *Adv. Mater.*, 2018, **30**, 1800191-1800196.
34. M. Nazemi, S. R. Panikkanvalappil and M. A. El-Sayed, *Nano Energy*, 2018, **49**, 316-323.
35. Q. Liu, X. Zhang, B. Zhang, Y. Luo, G. Cui, F. Xie and X. Sun, *Nanoscale*, 2018, **10**, 14386-14389.
36. H. Huang, L. Xia, X. Shi, A. M. Asiri and X. Sun, *Chem. Commun.*, 2018, **54**, 11427-11430.
37. G. F. Chen, X. Cao, S. Wu, X. Zeng, L. X. Ding, M. Zhu and H. Wang, *J. Am. Chem. Soc.*, 2017, **139**, 9771-9774.
38. D. Yang, T. Chen and Z. Wang, *J. Mater. Chem. A*, 2017, **5**, 18967-18971.
